# Supplementary material for: The interplay between neoantigens and immune cells in sarcomas treated with checkpoint inhibition
Source: Front Immunol. 2023 Sep 20;14:1226445. doi: 10.3389/fimmu.2023.1226445 (PMC10548483; doi:10.3389/fimmu.2023.1226445)
Supplement: Supplementary file 12 [file Table_5.xlsx]

## Sheet: Sheet1
NOI_ID	Sample_ID	Patient_USI	SARC-ID	Tissue	Sample	Filename
p1	OAACMG-Baseline	OAACMG	096-017	Normal	DNA	dna.normal.096-017.R1.fastq.gz
p1	OAACMG-Baseline	OAACMG	096-017	Normal	DNA	dna.normal.096-017.R2.fastq.gz
p1	OAACMG-Baseline	OAACMG	096-017	Tumor	DNA	dna.tumor.OAACMG-Baseline.R1.fastq.gz
p1	OAACMG-Baseline	OAACMG	096-017	Tumor	DNA	dna.tumor.OAACMG-Baseline.R2.fastq.gz
p1	OAACMG-Baseline	OAACMG	096-017	Tumor	RNA	rna.tumor.OAACMG-Baseline.R1.fastq.gz
p1	OAACMG-Baseline	OAACMG	096-017	Tumor	RNA	rna.tumor.OAACMG-Baseline.R2.fastq.gz
p2	OAACMH-Baseline	OAACMH	532-018	Normal	DNA	dna.normal.532-018-PBMC.R1.fastq.gz
p2	OAACMH-Baseline	OAACMH	532-018	Normal	DNA	dna.normal.532-018-PBMC.R2.fastq.gz
p2	OAACMH-Baseline	OAACMH	532-018	Tumor	DNA	dna.tumor.OAACMH-Baseline.R1.fastq.gz
p2	OAACMH-Baseline	OAACMH	532-018	Tumor	DNA	dna.tumor.OAACMH-Baseline.R2.fastq.gz
p2	OAACMH-Baseline	OAACMH	532-018	Tumor	RNA	rna.tumor.OAACMH-Baseline.R1.fastq.gz
p2	OAACMH-Baseline	OAACMH	532-018	Tumor	RNA	rna.tumor.OAACMH-Baseline.R2.fastq.gz
p3	OAACMI-Baseline	OAACMI	096-019	Normal	DNA	dna.normal.096-019-PBMC.R1.fastq.gz
p3	OAACMI-Baseline	OAACMI	096-019	Normal	DNA	dna.normal.096-019-PBMC.R2.fastq.gz
p3	OAACMI-Baseline	OAACMI	096-019	Tumor	DNA	dna.tumor.OAACMI-Baseline.R1.fastq.gz
p3	OAACMI-Baseline	OAACMI	096-019	Tumor	DNA	dna.tumor.OAACMI-Baseline.R2.fastq.gz
p3	OAACMI-Baseline	OAACMI	096-019	Tumor	RNA	rna.tumor.OAACMI-Baseline.R1.fastq.gz
p3	OAACMI-Baseline	OAACMI	096-019	Tumor	RNA	rna.tumor.OAACMI-Baseline.R2.fastq.gz
p4	OAACMJ-Baseline	OAACMJ	048-020	Normal	DNA	dna.normal.048-020.R1.fastq.gz
p4	OAACMJ-Baseline	OAACMJ	048-020	Normal	DNA	dna.normal.048-020.R2.fastq.gz
p4	OAACMJ-Baseline	OAACMJ	048-020	Tumor	DNA	dna.tumor.OAACMJ-Baseline.R1.fastq.gz
p4	OAACMJ-Baseline	OAACMJ	048-020	Tumor	DNA	dna.tumor.OAACMJ-Baseline.R2.fastq.gz
p4	OAACMJ-Baseline	OAACMJ	048-020	Tumor	RNA	rna.tumor.OAACMJ-Baseline.R1.fastq.gz
p4	OAACMJ-Baseline	OAACMJ	048-020	Tumor	RNA	rna.tumor.OAACMJ-Baseline.R2.fastq.gz
p5	OAACMK-Baseline-DNA	OAACMK	096-021	Normal	DNA	dna.normal.096-021.R1.fastq.gz
p5	OAACMK-Baseline-DNA	OAACMK	096-021	Normal	DNA	dna.normal.096-021.R2.fastq.gz
p5	OAACMK-Baseline-DNA	OAACMK	096-021	Tumor	DNA	dna.tumor.OAACMK-Baseline-DNA.R1.fastq.gz
p5	OAACMK-Baseline-DNA	OAACMK	096-021	Tumor	DNA	dna.tumor.OAACMK-Baseline-DNA.R2.fastq.gz
p5	OAACMK-Baseline-DNA	OAACMK	096-021	Tumor	RNA	rna.tumor.OAACMK-Baseline.R1.fastq.gz
p5	OAACMK-Baseline-DNA	OAACMK	096-021	Tumor	RNA	rna.tumor.OAACMK-Baseline.R2.fastq.gz
p5_w8	OAACMK-week-8-DNA	OAACMK	096-021	Normal	DNA	dna.normal.096-021.R1.fastq.gz
p5_w8	OAACMK-week-8-DNA	OAACMK	096-021	Normal	DNA	dna.normal.096-021.R2.fastq.gz
p5_w8	OAACMK-week-8-DNA	OAACMK	096-021	Tumor	DNA	dna.tumor.OAACMK-week-8.R1.fastq.gz
p5_w8	OAACMK-week-8-DNA	OAACMK	096-021	Tumor	DNA	dna.tumor.OAACMK-week-8.R2.fastq.gz
p5_w8	OAACMK-week-8-DNA	OAACMK	096-021	Tumor	RNA	rna.tumor.OAACMK-week-8.R1.fastq.gz
p5_w8	OAACMK-week-8-DNA	OAACMK	096-021	Tumor	RNA	rna.tumor.OAACMK-week-8.R2.fastq.gz
p6	OAACML-Baseline	OAACML	048-025	Normal	DNA	dna.normal.048-025.R1.fastq.gz
p6	OAACML-Baseline	OAACML	048-025	Normal	DNA	dna.normal.048-025.R2.fastq.gz
p6	OAACML-Baseline	OAACML	048-025	Tumor	DNA	dna.tumor.OAACML-Baseline.R1.fastq.gz
p6	OAACML-Baseline	OAACML	048-025	Tumor	DNA	dna.tumor.OAACML-Baseline.R2.fastq.gz
p6	OAACML-Baseline	OAACML	048-025	Tumor	RNA	rna.tumor.OAACML-Baseline.R1.fastq.gz
p6	OAACML-Baseline	OAACML	048-025	Tumor	RNA	rna.tumor.OAACML-Baseline.R2.fastq.gz
p7	OAACMP-Baseline	OAACMP	048-029	Normal	DNA	dna.normal.048-029.R1.fastq.gz
p7	OAACMP-Baseline	OAACMP	048-029	Normal	DNA	dna.normal.048-029.R2.fastq.gz
p7	OAACMP-Baseline	OAACMP	048-029	Tumor	DNA	dna.tumor.OAACMP-Baseline.R1.fastq.gz
p7	OAACMP-Baseline	OAACMP	048-029	Tumor	DNA	dna.tumor.OAACMP-Baseline.R2.fastq.gz
p7	OAACMP-Baseline	OAACMP	048-029	Tumor	RNA	rna.tumor.OAACMP-Baseline.R1.fastq.gz
p7	OAACMP-Baseline	OAACMP	048-029	Tumor	RNA	rna.tumor.OAACMP-Baseline.R2.fastq.gz
p8	OAACMS-Baseline	OAACMS	040-022	Normal	DNA	dna.normal.040-022.R1.fastq.gz
p8	OAACMS-Baseline	OAACMS	040-022	Normal	DNA	dna.normal.040-022.R2.fastq.gz
p8	OAACMS-Baseline	OAACMS	040-022	Tumor	DNA	dna.tumor.OAACMS-Baseline.R1.fastq.gz
p8	OAACMS-Baseline	OAACMS	040-022	Tumor	DNA	dna.tumor.OAACMS-Baseline.R2.fastq.gz
p8	OAACMS-Baseline	OAACMS	040-022	Tumor	RNA	rna.tumor.OAACMS-Baseline.R1.fastq.gz
p8	OAACMS-Baseline	OAACMS	040-022	Tumor	RNA	rna.tumor.OAACMS-Baseline.R2.fastq.gz
p9	OAACMT-Baseline	OAACMT	040-026	Normal	DNA	dna.normal.040-026.R1.fastq.gz
p9	OAACMT-Baseline	OAACMT	040-026	Normal	DNA	dna.normal.040-026.R2.fastq.gz
p9	OAACMT-Baseline	OAACMT	040-026	Tumor	DNA	dna.tumor.OAACMT-Baseline.R1.fastq.gz
p9	OAACMT-Baseline	OAACMT	040-026	Tumor	DNA	dna.tumor.OAACMT-Baseline.R2.fastq.gz
p9	OAACMT-Baseline	OAACMT	040-026	Tumor	RNA	rna.tumor.OAACMT-Baseline.R1.fastq.gz
p9	OAACMT-Baseline	OAACMT	040-026	Tumor	RNA	rna.tumor.OAACMT-Baseline.R2.fastq.gz
p9_w8	OAACMT-Week-8	OAACMT	040-026	Normal	DNA	dna.normal.040-026.R1.fastq.gz
p9_w8	OAACMT-Week-8	OAACMT	040-026	Normal	DNA	dna.normal.040-026.R2.fastq.gz
p9_w8	OAACMT-Week-8	OAACMT	040-026	Tumor	DNA	dna.tumor.OAACMT-Week-8.R1.fastq.gz
p9_w8	OAACMT-Week-8	OAACMT	040-026	Tumor	DNA	dna.tumor.OAACMT-Week-8.R2.fastq.gz
p9_w8	OAACMT-Week-8	OAACMT	040-026	Tumor	RNA	rna.tumor.OAACMT-Week-8.R1.fastq.gz
p9_w8	OAACMT-Week-8	OAACMT	040-026	Tumor	RNA	rna.tumor.OAACMT-Week-8.R2.fastq.gz
p10	OAACMU-Baseline	OAACMU	048-031	Normal	DNA	dna.normal.048-031.R1.fastq.gz
p10	OAACMU-Baseline	OAACMU	048-031	Normal	DNA	dna.normal.048-031.R2.fastq.gz
p10	OAACMU-Baseline	OAACMU	048-031	Tumor	DNA	dna.tumor.OAACMU-Baseline.R1.fastq.gz
p10	OAACMU-Baseline	OAACMU	048-031	Tumor	DNA	dna.tumor.OAACMU-Baseline.R2.fastq.gz
p10	OAACMU-Baseline	OAACMU	048-031	Tumor	RNA	rna.tumor.OAACMU-Baseline.R1.fastq.gz
p10	OAACMU-Baseline	OAACMU	048-031	Tumor	RNA	rna.tumor.OAACMU-Baseline.R2.fastq.gz
p11	OAACMW-Baseline	OAACMW	092-030	Normal	DNA	dna.normal.092-030.R1.fastq.gz
p11	OAACMW-Baseline	OAACMW	092-030	Normal	DNA	dna.normal.092-030.R2.fastq.gz
p11	OAACMW-Baseline	OAACMW	092-030	Tumor	DNA	dna.tumor.OAACMW-Baseline.R1.fastq.gz
p11	OAACMW-Baseline	OAACMW	092-030	Tumor	DNA	dna.tumor.OAACMW-Baseline.R2.fastq.gz
p11	OAACMW-Baseline	OAACMW	092-030	Tumor	RNA	rna.tumor.OAACMW-Baseline.R1.fastq.gz
p11	OAACMW-Baseline	OAACMW	092-030	Tumor	RNA	rna.tumor.OAACMW-Baseline.R2.fastq.gz
p11_w8	OAACMW-Week-8	OAACMW	092-030	Normal	DNA	dna.normal.092-030.R1.fastq.gz
p11_w8	OAACMW-Week-8	OAACMW	092-030	Normal	DNA	dna.normal.092-030.R2.fastq.gz
p11_w8	OAACMW-Week-8	OAACMW	092-030	Tumor	DNA	dna.tumor.OAACMW-Week-8.R1.fastq.gz
p11_w8	OAACMW-Week-8	OAACMW	092-030	Tumor	DNA	dna.tumor.OAACMW-Week-8.R2.fastq.gz
p11_w8	OAACMW-Week-8	OAACMW	092-030	Tumor	RNA	rna.tumor.OAACMW-Week-8.R1.fastq.gz
p11_w8	OAACMW-Week-8	OAACMW	092-030	Tumor	RNA	rna.tumor.OAACMW-Week-8.R2.fastq.gz
p12	OAACNA-Baseline	OAACNA	092-034	Normal	DNA	dna.normal.092-034-PBMC.R1.fastq.gz
p12	OAACNA-Baseline	OAACNA	092-034	Normal	DNA	dna.normal.092-034-PBMC.R2.fastq.gz
p12	OAACNA-Baseline	OAACNA	092-034	Tumor	DNA	dna.tumor.OAACNA-Baseline.R1.fastq.gz
p12	OAACNA-Baseline	OAACNA	092-034	Tumor	DNA	dna.tumor.OAACNA-Baseline.R2.fastq.gz
p12	OAACNA-Baseline	OAACNA	092-034	Tumor	RNA	rna.tumor.OAACNA-Baseline.R1.fastq.gz
p12	OAACNA-Baseline	OAACNA	092-034	Tumor	RNA	rna.tumor.OAACNA-Baseline.R2.fastq.gz
p12_w8	OAACNA-Week-8	OAACNA	092-034	Normal	DNA	dna.normal.092-034.R1.fastq.gz
p12_w8	OAACNA-Week-8	OAACNA	092-034	Normal	DNA	dna.normal.092-034.R2.fastq.gz
p12_w8	OAACNA-Week-8	OAACNA	092-034	Tumor	DNA	dna.tumor.OAACNA-Week-8.R1.fastq.gz
p12_w8	OAACNA-Week-8	OAACNA	092-034	Tumor	DNA	dna.tumor.OAACNA-Week-8.R2.fastq.gz
p12_w8	OAACNA-Week-8	OAACNA	092-034	Tumor	RNA	rna.tumor.OAACNA-Week-8.R1.fastq.gz
p12_w8	OAACNA-Week-8	OAACNA	092-034	Tumor	RNA	rna.tumor.OAACNA-Week-8.R2.fastq.gz
p13	OAACND-Baseline	OAACND	048-037	Normal	DNA	dna.normal.048-037.R1.fastq.gz
p13	OAACND-Baseline	OAACND	048-037	Normal	DNA	dna.normal.048-037.R2.fastq.gz
p13	OAACND-Baseline	OAACND	048-037	Tumor	DNA	dna.tumor.OAACND-Baseline.R1.fastq.gz
p13	OAACND-Baseline	OAACND	048-037	Tumor	DNA	dna.tumor.OAACND-Baseline.R2.fastq.gz
p13	OAACND-Baseline	OAACND	048-037	Tumor	RNA	rna.tumor.OAACND-Baseline.R1.fastq.gz
p13	OAACND-Baseline	OAACND	048-037	Tumor	RNA	rna.tumor.OAACND-Baseline.R2.fastq.gz
p14	OAACNF-Baseline	OAACNF	001-038	Normal	DNA	dna.normal.001-038.R1.fastq.gz
p14	OAACNF-Baseline	OAACNF	001-038	Normal	DNA	dna.normal.001-038.R2.fastq.gz
p14	OAACNF-Baseline	OAACNF	001-038	Tumor	DNA	dna.tumor.OAACNF-Baseline.R1.fastq.gz
p14	OAACNF-Baseline	OAACNF	001-038	Tumor	DNA	dna.tumor.OAACNF-Baseline.R2.fastq.gz
p14	OAACNF-Baseline	OAACNF	001-038	Tumor	RNA	rna.tumor.OAACNF-Baseline.R1.fastq.gz
p14	OAACNF-Baseline	OAACNF	001-038	Tumor	RNA	rna.tumor.OAACNF-Baseline.R2.fastq.gz
p15	OAACNH-Baseline-DNA	OAACNH	048-040	Normal	DNA	dna.normal.048-040.R1.fastq.gz
p15	OAACNH-Baseline-DNA	OAACNH	048-040	Normal	DNA	dna.normal.048-040.R2.fastq.gz
p15	OAACNH-Baseline-DNA	OAACNH	048-040	Tumor	DNA	dna.tumor.OAACNH-Baseline.R1.fastq.gz
p15	OAACNH-Baseline-DNA	OAACNH	048-040	Tumor	DNA	dna.tumor.OAACNH-Baseline.R2.fastq.gz
p15	OAACNH-Baseline-DNA	OAACNH	048-040	Tumor	RNA	rna.tumor.OAACNH-Baseline.R1.fastq.gz
p15	OAACNH-Baseline-DNA	OAACNH	048-040	Tumor	RNA	rna.tumor.OAACNH-Baseline.R2.fastq.gz
p16	OAACNP-Baseline-normal-DNA-OAACRU	OAACNP	048-047	Normal	DNA	dna.n.run1-HG2H7BBXY.048-074_PBMC_S5_R1_001.fastq.gz
p16	OAACNP-Baseline-normal-DNA-OAACRU	OAACNP	048-047	Normal	DNA	dna.n.run1-HG2H7BBXY.048-074_PBMC_S5_R2_001.fastq.gz
p16	OAACNP-Baseline-normal-DNA-OAACRU	OAACNP	048-047	Tumor	DNA	dna.t.OAACNP-Baseline-DNA_R1_001.fastq.gz
p16	OAACNP-Baseline-normal-DNA-OAACRU	OAACNP	048-047	Tumor	DNA	dna.t.OAACNP-Baseline-DNA_R2_001.fastq.gz
p16	OAACNP-Baseline-normal-DNA-OAACRU	OAACNP	048-047	Tumor	RNA	rna.tumor.OAACNP-Baseline-RNA_S12_R1_001.fastq.gz
p16	OAACNP-Baseline-normal-DNA-OAACRU	OAACNP	048-047	Tumor	RNA	rna.tumor.OAACNP-Baseline-RNA_S12_R2_001.fastq.gz
p17	OAACNS-Baseline	OAACNS	001-051	Normal	DNA	dna.normal.001-051-PBMC.R1.fastq.gz
p17	OAACNS-Baseline	OAACNS	001-051	Normal	DNA	dna.normal.001-051-PBMC.R2.fastq.gz
p17	OAACNS-Baseline	OAACNS	001-051	Tumor	DNA	dna.tumor.OAACNS-Baseline.R1.fastq.gz
p17	OAACNS-Baseline	OAACNS	001-051	Tumor	DNA	dna.tumor.OAACNS-Baseline.R2.fastq.gz
p17	OAACNS-Baseline	OAACNS	001-051	Tumor	RNA	rna.tumor.OAACNS-Baseline.R1.fastq.gz
p17	OAACNS-Baseline	OAACNS	001-051	Tumor	RNA	rna.tumor.OAACNS-Baseline.R2.fastq.gz
p18	OAACPB-Baseline	OAACPB	001-058	Normal	DNA	dna.normal.001-058-PBMC.R1.fastq.gz
p18	OAACPB-Baseline	OAACPB	001-058	Normal	DNA	dna.normal.001-058-PBMC.R2.fastq.gz
p18	OAACPB-Baseline	OAACPB	001-058	Tumor	DNA	dna.tumor.OAACPB-Baseline.R1.fastq.gz
p18	OAACPB-Baseline	OAACPB	001-058	Tumor	DNA	dna.tumor.OAACPB-Baseline.R2.fastq.gz
p18	OAACPB-Baseline	OAACPB	001-058	Tumor	RNA	rna.tumor.OAACPB-Baseline.R1.fastq.gz
p18	OAACPB-Baseline	OAACPB	001-058	Tumor	RNA	rna.tumor.OAACPB-Baseline.R2.fastq.gz
p19	OAACPD-Baseline	OAACPD	092-049	Normal	DNA	dna.normal.092-049.R1.fastq.gz
p19	OAACPD-Baseline	OAACPD	092-049	Normal	DNA	dna.normal.092-049.R2.fastq.gz
p19	OAACPD-Baseline	OAACPD	092-049	Tumor	DNA	dna.tumor.OAACPD-Baseline.R1.fastq.gz
p19	OAACPD-Baseline	OAACPD	092-049	Tumor	DNA	dna.tumor.OAACPD-Baseline.R2.fastq.gz
p19	OAACPD-Baseline	OAACPD	092-049	Tumor	RNA	rna.tumor.OAACPD-Baseline.R1.fastq.gz
p19	OAACPD-Baseline	OAACPD	092-049	Tumor	RNA	rna.tumor.OAACPD-Baseline.R1.fastq.gz
p19_w8	OAACPD-Week-8	OAACPD	092-049	Normal	DNA	dna.normal.092-049.R1.fastq.gz
p19_w8	OAACPD-Week-8	OAACPD	092-049	Normal	DNA	dna.normal.092-049.R2.fastq.gz
p19_w8	OAACPD-Week-8	OAACPD	092-049	Tumor	DNA	dna.tumor.OAACPD-Week-8.R1.fastq.gz
p19_w8	OAACPD-Week-8	OAACPD	092-049	Tumor	DNA	dna.tumor.OAACPD-Week-8.R2.fastq.gz
p19_w8	OAACPD-Week-8	OAACPD	092-049	Tumor	RNA	rna.tumor.OAACPD-Week-8.R1.fastq.gz
p19_w8	OAACPD-Week-8	OAACPD	092-049	Tumor	RNA	rna.tumor.OAACPD-Week-8.R2.fastq.gz
p20	OAACPE-Baseline	OAACPE	071-052	Normal	DNA	dna.normal.071-052.R1.fastq.gz
p20	OAACPE-Baseline	OAACPE	071-052	Normal	DNA	dna.normal.071-052.R2.fastq.gz
p20	OAACPE-Baseline	OAACPE	071-052	Tumor	DNA	dna.tumor.OAACPE-Baseline.R1.fastq.gz
p20	OAACPE-Baseline	OAACPE	071-052	Tumor	DNA	dna.tumor.OAACPE-Baseline.R2.fastq.gz
p20	OAACPE-Baseline	OAACPE	071-052	Tumor	RNA	rna.tumor.OAACPE-Baseline.R1.fastq.gz
p20	OAACPE-Baseline	OAACPE	071-052	Tumor	RNA	rna.tumor.OAACPE-Baseline.R2.fastq.gz
p21	OAACPF-Baseline	OAACPF	021-060	Normal	DNA	dna.normal.021-060.R1.fastq.gz
p21	OAACPF-Baseline	OAACPF	021-060	Normal	DNA	dna.normal.021-060.R2.fastq.gz
p21	OAACPF-Baseline	OAACPF	021-060	Tumor	DNA	dna.tumor.OAACPF-Baseline.R1.fastq.gz
p21	OAACPF-Baseline	OAACPF	021-060	Tumor	DNA	dna.tumor.OAACPF-Baseline.R2.fastq.gz
p21	OAACPF-Baseline	OAACPF	021-060	Tumor	RNA	rna.tumor.OAACPF-Baseline.R1.fastq.gz
p21	OAACPF-Baseline	OAACPF	021-060	Tumor	RNA	rna.tumor.OAACPF-Baseline.R2.fastq.gz
p22	OAACPG-Baseline-normal-DNA-OAACNP	OAACPG	048-059	Normal	DNA	dna.normal.048-047.R1.fastq.gz
p22	OAACPG-Baseline-normal-DNA-OAACNP	OAACPG	048-059	Normal	DNA	dna.normal.048-047.R2.fastq.gz
p22	OAACPG-Baseline-normal-DNA-OAACNP	OAACPG	048-059	Tumor	DNA	dna.tumor.OAACPG-Baseline.R1.fastq.gz
p22	OAACPG-Baseline-normal-DNA-OAACNP	OAACPG	048-059	Tumor	DNA	dna.tumor.OAACPG-Baseline.R2.fastq.gz
p22	OAACPG-Baseline-normal-DNA-OAACNP	OAACPG	048-059	Tumor	RNA	rna.tumor.OAACPG-Baseline.R1.fastq.gz
p22	OAACPG-Baseline-normal-DNA-OAACNP	OAACPG	048-059	Tumor	RNA	rna.tumor.OAACPG-Baseline.R2.fastq.gz
p23	OAACPI-Baseline-DNA	OAACPI	071-056	Normal	DNA	dna.normal.071-056.R1.fastq.gz
p23	OAACPI-Baseline-DNA	OAACPI	071-056	Normal	DNA	dna.normal.071-056.R2.fastq.gz
p23	OAACPI-Baseline-DNA	OAACPI	071-056	Tumor	DNA	dna.tumor.OAACPI-Baseline-DNA.R1.fastq.gz
p23	OAACPI-Baseline-DNA	OAACPI	071-056	Tumor	DNA	dna.tumor.OAACPI-Baseline-DNA.R2.fastq.gz
p23	OAACPI-Baseline-DNA	OAACPI	071-056	Tumor	RNA	rna.tumor.OAACPI-Baseline.R1.fastq.gz
p23	OAACPI-Baseline-DNA	OAACPI	071-056	Tumor	RNA	rna.tumor.OAACPI-Baseline.R2.fastq.gz
p23_w8	OAACPI-Week-8-DNA	OAACPI	071-056	Normal	DNA	dna.normal.071-056.R1.fastq.gz
p23_w8	OAACPI-Week-8-DNA	OAACPI	071-056	Normal	DNA	dna.normal.071-056.R2.fastq.gz
p23_w8	OAACPI-Week-8-DNA	OAACPI	071-056	Tumor	DNA	dna.tumor.OAACPI-Week-8-DNA.R1.fastq.gz
p23_w8	OAACPI-Week-8-DNA	OAACPI	071-056	Tumor	DNA	dna.tumor.OAACPI-Week-8-DNA.R2.fastq.gz
p23_w8	OAACPI-Week-8-DNA	OAACPI	071-056	Tumor	RNA	rna.tumor.OAACPI-Week-8.R1.fastq.gz
p23_w8	OAACPI-Week-8-DNA	OAACPI	071-056	Tumor	RNA	rna.tumor.OAACPI-Week-8.R2.fastq.gz
p24	OAACPM-Baseline	OAACPM	008-064	Normal	DNA	dna.normal.008-064-PBMC.R1.fastq.gz
p24	OAACPM-Baseline	OAACPM	008-064	Normal	DNA	dna.normal.008-064-PBMC.R2.fastq.gz
p24	OAACPM-Baseline	OAACPM	008-064	Tumor	DNA	dna.tumor.OAACPM-Baseline.R1.fastq.gz
p24	OAACPM-Baseline	OAACPM	008-064	Tumor	DNA	dna.tumor.OAACPM-Baseline.R2.fastq.gz
p24	OAACPM-Baseline	OAACPM	008-064	Tumor	RNA	rna.tumor.OAACPM-Baseline.R1.fastq.gz
p24	OAACPM-Baseline	OAACPM	008-064	Tumor	RNA	rna.tumor.OAACPM-Baseline.R2.fastq.gz
p25	OAACPR-Baseline	OAACPR	021-063	Normal	DNA	dna.normal.021-063-PBMC.R1.fastq.gz
p25	OAACPR-Baseline	OAACPR	021-063	Normal	DNA	dna.normal.021-063-PBMC.R2.fastq.gz
p25	OAACPR-Baseline	OAACPR	021-063	Tumor	DNA	dna.tumor.OAACPR-Baseline.R1.fastq.gz
p25	OAACPR-Baseline	OAACPR	021-063	Tumor	DNA	dna.tumor.OAACPR-Baseline.R2.fastq.gz
p25	OAACPR-Baseline	OAACPR	021-063	Tumor	RNA	rna.tumor.OAACPR-Baseline.R1.fastq.gz
p25	OAACPR-Baseline	OAACPR	021-063	Tumor	RNA	rna.tumor.OAACPR-Baseline.R2.fastq.gz
p26	OAACPS-Baseline	OAACPS	034-066	Normal	DNA	dna.normal.034-066.R1.fastq.gz
p26	OAACPS-Baseline	OAACPS	034-066	Normal	DNA	dna.normal.034-066.R2.fastq.gz
p26	OAACPS-Baseline	OAACPS	034-066	Tumor	DNA	dna.tumor.OAACPS-Baseline.R1.fastq.gz
p26	OAACPS-Baseline	OAACPS	034-066	Tumor	DNA	dna.tumor.OAACPS-Baseline.R2.fastq.gz
p26	OAACPS-Baseline	OAACPS	034-066	Tumor	RNA	rna.tumor.OAACPS-Baseline.R1.fastq.gz
p26	OAACPS-Baseline	OAACPS	034-066	Tumor	RNA	rna.tumor.OAACPS-Baseline.R2.fastq.gz
p27	OAACPV-Baseline	OAACPV	021-067	Normal	DNA	dna.normal.021-067-PBMC.R1.fastq.gz
p27	OAACPV-Baseline	OAACPV	021-067	Normal	DNA	dna.normal.021-067-PBMC.R2.fastq.gz
p27	OAACPV-Baseline	OAACPV	021-067	Tumor	DNA	dna.tumor.OAACPV-Baseline.R1.fastq.gz
p27	OAACPV-Baseline	OAACPV	021-067	Tumor	DNA	dna.tumor.OAACPV-Baseline.R2.fastq.gz
p27	OAACPV-Baseline	OAACPV	021-067	Tumor	RNA	rna.tumor.OAACPV-Baseline.R1.fastq.gz
p27	OAACPV-Baseline	OAACPV	021-067	Tumor	RNA	rna.tumor.OAACPV-Baseline.R2.fastq.gz
p28	OAACPX-Baseline	OAACPX	008-069	Normal	DNA	dna.normal.008-069-PBMC.R1.fastq.gz
p28	OAACPX-Baseline	OAACPX	008-069	Normal	DNA	dna.normal.008-069-PBMC.R2.fastq.gz
p28	OAACPX-Baseline	OAACPX	008-069	Tumor	DNA	dna.tumor.OAACPX-Baseline.R1.fastq.gz
p28	OAACPX-Baseline	OAACPX	008-069	Tumor	DNA	dna.tumor.OAACPX-Baseline.R2.fastq.gz
p28	OAACPX-Baseline	OAACPX	008-069	Tumor	RNA	rna.tumor.OAACPX-Baseline.R1.fastq.gz
p28	OAACPX-Baseline	OAACPX	008-069	Tumor	RNA	rna.tumor.OAACPX-Baseline.R2.fastq.gz
p29	OAACRE-Baseline	OAACRE	021-071	Normal	DNA	dna.normal.021-071.R1.fastq.gz
p29	OAACRE-Baseline	OAACRE	021-071	Normal	DNA	dna.normal.021-071.R2.fastq.gz
p29	OAACRE-Baseline	OAACRE	021-071	Tumor	DNA	dna.tumor.OAACRE-Baseline.R1.fastq.gz
p29	OAACRE-Baseline	OAACRE	021-071	Tumor	DNA	dna.tumor.OAACRE-Baseline.R2.fastq.gz
p29	OAACRE-Baseline	OAACRE	021-071	Tumor	RNA	rna.tumor.OAACRE-Baseline.R1.fastq.gz
p29	OAACRE-Baseline	OAACRE	021-071	Tumor	RNA	rna.tumor.OAACRE-Baseline.R2.fastq.gz
p30	OAACRT-Baseline-DNA	OAACRT	532-073	Normal	DNA	dna.normal.532-073.R1.fastq.gz
p30	OAACRT-Baseline-DNA	OAACRT	532-073	Normal	DNA	dna.normal.532-073.R2.fastq.gz
p30	OAACRT-Baseline-DNA	OAACRT	532-073	Tumor	DNA	dna.tumor.OAACRT-Baseline-DNA.R1.fastq.gz
p30	OAACRT-Baseline-DNA	OAACRT	532-073	Tumor	DNA	dna.tumor.OAACRT-Baseline-DNA.R2.fastq.gz
p30	OAACRT-Baseline-DNA	OAACRT	532-073	Tumor	RNA	rna.tumor.OAACRT-Baseline.R1.fastq.gz
p30	OAACRT-Baseline-DNA	OAACRT	532-073	Tumor	RNA	rna.tumor.OAACRT-Baseline.R2.fastq.gz
p30_w8	OAACRT-Week-8-DNA	OAACRT	532-073	Normal	DNA	dna.normal.532-073.R1.fastq.gz
p30_w8	OAACRT-Week-8-DNA	OAACRT	532-073	Normal	DNA	dna.normal.532-073.R2.fastq.gz
p30_w8	OAACRT-Week-8-DNA	OAACRT	532-073	Tumor	DNA	dna.tumor.OAACRT-Week-8-DNA.R1.fastq.gz
p30_w8	OAACRT-Week-8-DNA	OAACRT	532-073	Tumor	DNA	dna.tumor.OAACRT-Week-8-DNA.R2.fastq.gz
p30_w8	OAACRT-Week-8-DNA	OAACRT	532-073	Tumor	RNA	rna.tumor.OAACRT-Week-8.R1.fastq.gz
p30_w8	OAACRT-Week-8-DNA	OAACRT	532-073	Tumor	RNA	rna.tumor.OAACRT-Week-8.R2.fastq.gz
p31	OAACRX-Baseline-DNA	OAACRX	532-077	Normal	DNA	dna.normal.532-077.R1.fastq.gz
p31	OAACRX-Baseline-DNA	OAACRX	532-077	Normal	DNA	dna.normal.532-077.R2.fastq.gz
p31	OAACRX-Baseline-DNA	OAACRX	532-077	Tumor	DNA	dna.tumor.OAACRX-Baseline-DNA.R1.fastq.gz
p31	OAACRX-Baseline-DNA	OAACRX	532-077	Tumor	DNA	dna.tumor.OAACRX-Baseline-DNA.R2.fastq.gz
p31	OAACRX-Baseline-DNA	OAACRX	532-077	Tumor	RNA	rna.tumor.OAACRX-Baseline.R1.fastq.gz
p31	OAACRX-Baseline-DNA	OAACRX	532-077	Tumor	RNA	rna.tumor.OAACRX-Baseline.R2.fastq.gz
